# Supplementary material for: Quantitative SERS by hot spot normalization – surface enhanced Rayleigh band intensity as an alternative evaluation parameter for SERS substrate performance
Source: Royal Society of Chemistry journal article supplement (doi:10.1039/c7fd00125h), 2017-01-01
Supplement: c7fd00125h1.pdf [file c7fd00125h1.pdf]

## Supporting Information for

### “Quantitative SERS by Hot Spot Normalization – Surface Enhanced Rayleigh Band Intensity as an Alternative Evaluation Parameter for SERS Substrate Performance”

Haoran Wei,<sup>1,2,3</sup> Alexis McCarthy,<sup>4</sup> Junyeob Song,<sup>5</sup> Wei Zhou,<sup>5</sup> Peter J. Vikesland\*<sup>1,2,3</sup>

<sup>1</sup> Department of Civil and Environmental Engineering, Virginia Tech, Blacksburg, Virginia;

<sup>2</sup> Virginia Tech Institute of Critical Technology and Applied Science (ICTAS) Sustainable Nanotechnology Center (VTSuN), Blacksburg, Virginia;

<sup>3</sup> Center for the Environmental Implications of Nanotechnology (CEINT), Duke University, Durham, North Carolina;

<sup>4</sup> Department of Chemistry, Virginia Tech, Blacksburg, Virginia

<sup>5</sup> Department of Electrical and Computer Engineering, Virginia Tech, Blacksburg, Virginia

Manuscript prepared for *Faraday Discussions*

Table S1  $I_{\text{Raman}}/I_{\text{Rayleigh}}$  acquired using different Raman instruments

| Instrument # | $I_{1076}/I_{\text{Rayleigh-max}}^1$ | $I_{1076}/I_{\text{Rayleigh-126}}^2$ |
|--------------|--------------------------------------|--------------------------------------|
| 1            | 1.70                                 | 1.70                                 |
| 2            | 0.97                                 | 1.62                                 |

<sup>1</sup>  $I_{\text{Rayleigh-max}}$  reflects the maximum intensity of the pseudo-Rayleigh band; <sup>2</sup>  $I_{\text{Rayleigh-126}}$  reflects the intensity of the Rayleigh band at 126  $\text{cm}^{-1}$ .

Table S2  $I_{\text{Rayleigh}}$  acquired using different Raman instruments

| Instrument # | $I_{\text{Rayleigh-2}}^1$ (CCD cts) | $I_{\text{Rayleigh-2}}/I_{\text{Rayleigh-1}}^2$ |
|--------------|-------------------------------------|-------------------------------------------------|
| 1            | 393                                 | 2.20                                            |
| 2            | 319                                 | 2.29                                            |

<sup>1</sup>  $I_{\text{Rayleigh-1}}$  is the pseudo-Rayleigh band intensity for substrate #1; <sup>2</sup>  $I_{\text{Rayleigh-1}}/I_{\text{Rayleigh-2}}$  is the ratio between the pseudo-Rayleigh band intensities of substrate #2 and substrate #1.

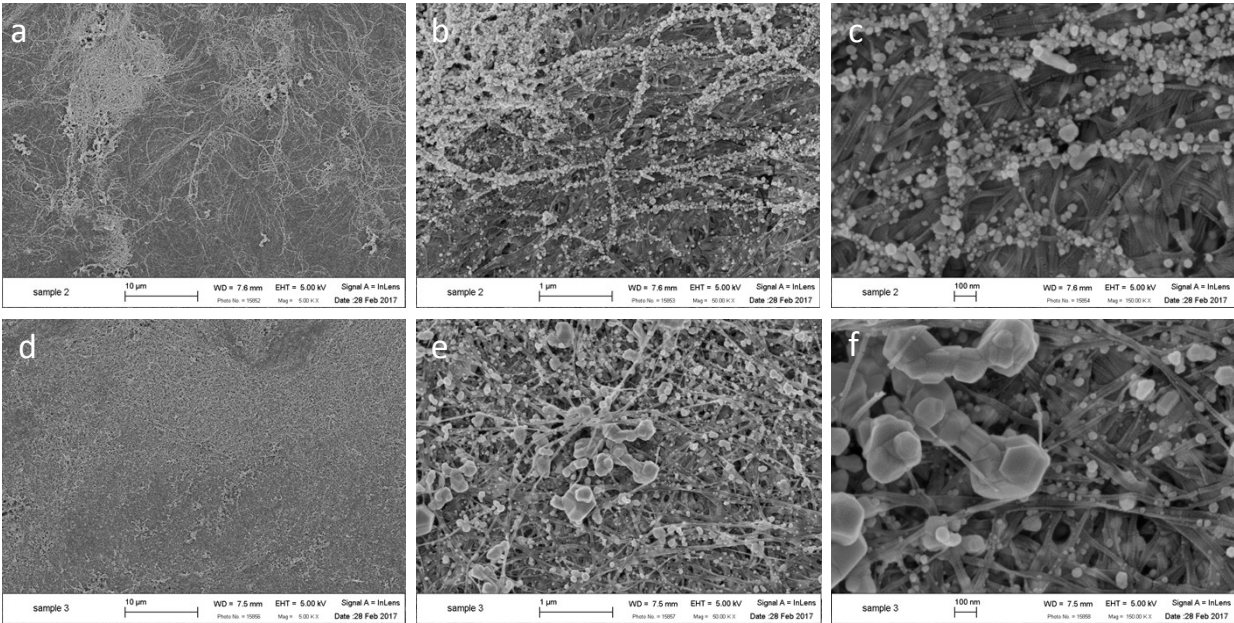

Figure S1. SEM images of the AuNP/BC-12 substrate with 5000 (a), 50000 (b), and 150000 (c) magnifications; SEM images of the AgNP/BC-25 substrate with 5000 (a), 50000 (b), and 150000 (c).

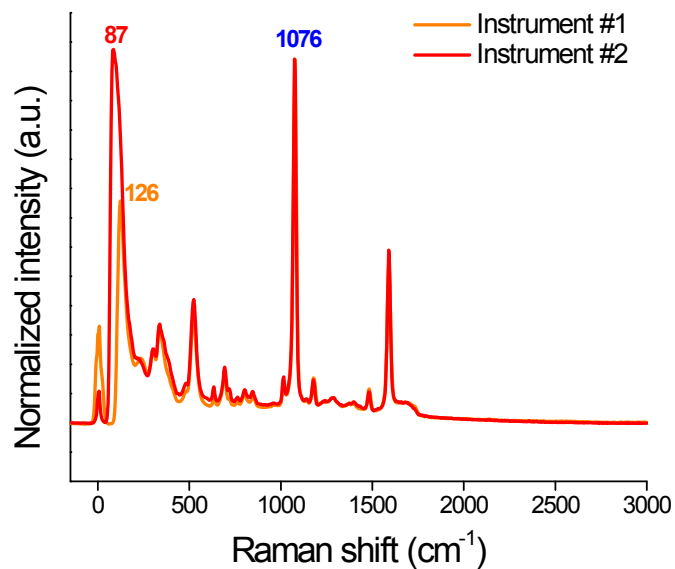

Figure S2. SERS spectra of 4-MBA on AuNP/BC-1.2 collected using the Raman instrument in our lab with an alternative edge filter and another Raman instrument in another lab. The spectra were normalized to the Raman intensity at 1076  $\text{cm}^{-1}$ .

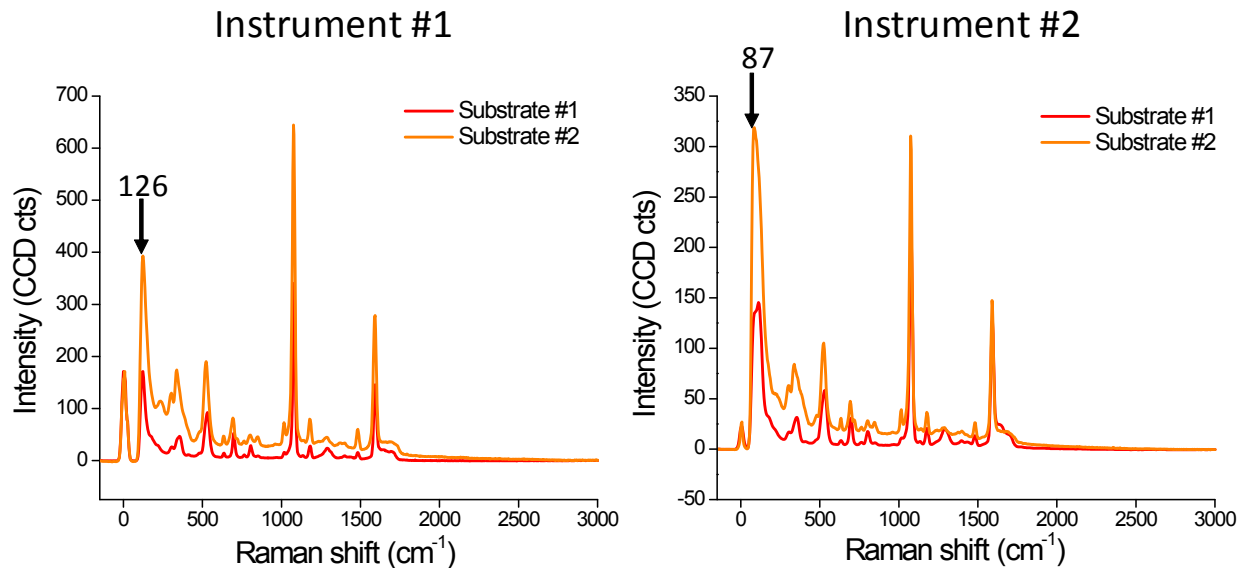

Figure S3. SERS spectra of 4-MBA on AuNP/BC-1.2 and A-AuNPs collected using the Raman instrument in our lab with an alternative edge filter and another Raman instrument in another lab.

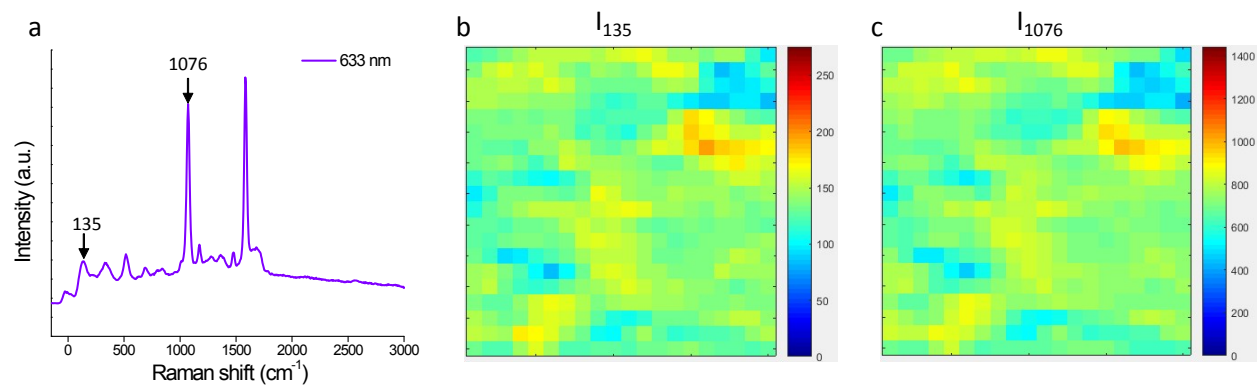

Figure S4. a) SERS spectrum of 4-MBA on AuNP/BC-1.2 collected using 633 nm laser; SERS maps tracking b) the Rayleigh band at 135 cm<sup>-1</sup> and c) the Raman band at 1076 cm<sup>-1</sup>.
